# Supplementary material for: Selective recognition of hydrogen sulfide using template and catalyst free grown ZnO nanorods
Source: Royal Society of Chemistry journal article supplement (doi:10.1039/c5ra07804k), 2015-01-01
Supplement: c5ra07804k1.pdf [file c5ra07804k1.pdf]

# Selective Recognition of Hydrogen Sulfide using Template and Catalyst Free Grown ZnO Nanorods

Ganesh Kumar Mani and John Bosco Balaguru Rayappan\*

Nano Sensors Lab @ Centre for Nano Technology & Advanced Biomaterials (CeNTAB) and

School of Electrical & Electronics Engineering (SEEE)

SASTRA University, Thanjavur 613 401, Tamil Nadu, India.

## Supplementary Files

Figure S1 Enlarged view of lower concentration sensing response,

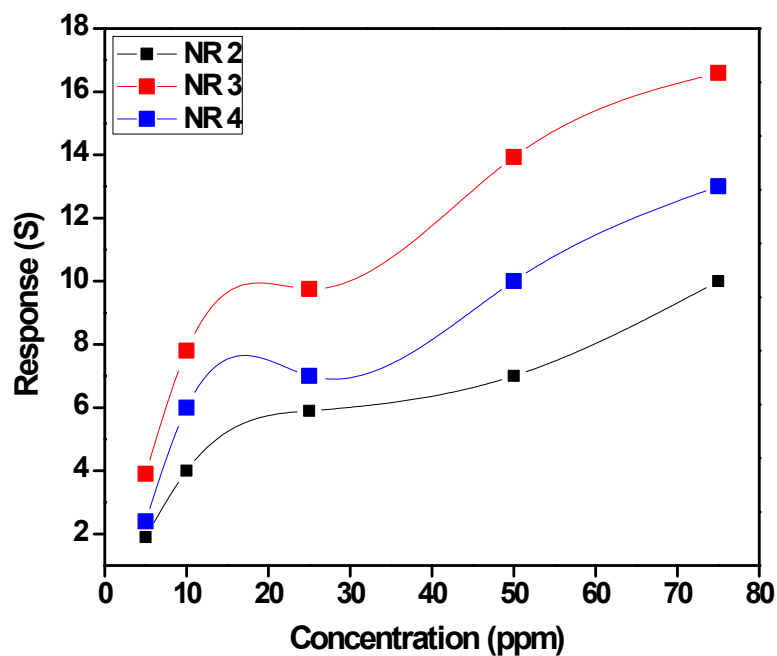

Figure S2: a) Response and b) recovery time characteristics of NR 3 sample with respect to various concentration levels.

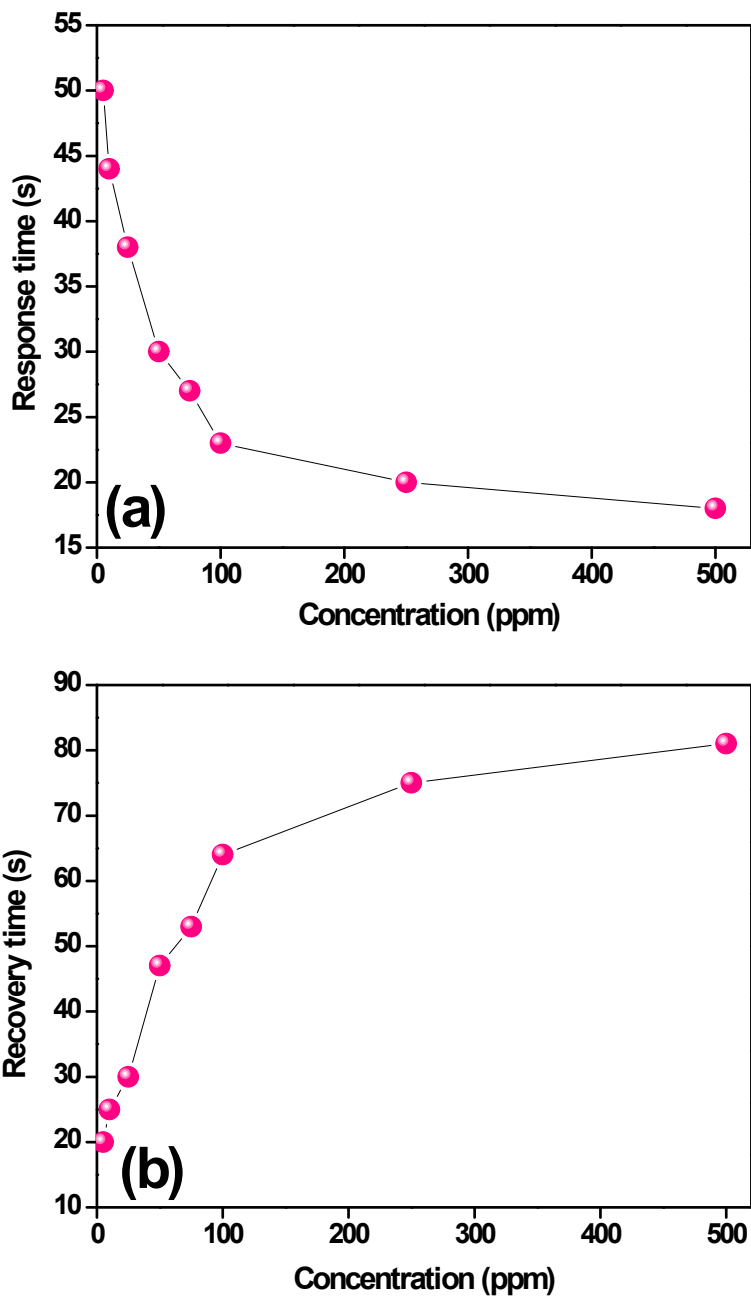

**Table S1**

| <b>Material</b>                           | <b>Structure</b> | <b>Operating temperature (°C)</b> | <b>Concentration (ppm)</b> | <b>Response</b> | <b>Response time (s)</b> | <b>Recovery time (s)</b> | <b>Ref.</b>               |
|-------------------------------------------|------------------|-----------------------------------|----------------------------|-----------------|--------------------------|--------------------------|---------------------------|
| <b>CuO-SnO<sub>2</sub></b>                | Thin film        | 150                               | 20                         | 7341            | 14                       | 118                      | (Chowdhuri et al., 2002)  |
| <b>ZnO</b>                                | Single nanowire  | RT                                | 300                        | 10              | -                        | -                        | (Liao et al., 2007)       |
| <b>ZnO</b>                                | Dendrites        | RT                                | 100                        | 17.3            | 15                       | 30                       | (Zhang et al., 2008)      |
| <b>ZnO</b>                                | Porous           | 332                               | 50                         | ~ 200           | 6                        | 10                       | (Liu et al., 2009)        |
| <b>In-doped ZnO</b>                       | Thin film        | 250                               | 1000                       | 13000           | 2                        | 240                      | (Badadhe and Mulla, 2009) |
| <b>β-AgVO<sub>3</sub></b>                 | Nanowire         | 250                               | 300                        | 1.10            | 3                        | 17                       | (Mai et al., 2010)        |
| <b>CuO-ZnO</b>                            | Hollow spheres   | 336                               | 5                          | 32.4            | 47                       | -                        | (S. J. Kim et al., 2012)  |
| <b>α-Fe<sub>2</sub>O<sub>3</sub></b>      | Nanochain        | 285                               | 5                          | 4.7             | 8                        | 65                       | (Ma et al., 2013)         |
| <b>CuO functionalized SnO<sub>2</sub></b> | Nanowire         | 300                               | 10                         | 15              | 9                        | 8                        | (S. S. Kim et al., 2012)  |
| <b>Zn<sub>2</sub>SnO<sub>4</sub></b>      | Microcrystals    | 270                               | 50                         | 45              | 10                       | 25                       | (Ma et al., 2012)         |

|                                                     |                 |           |            |               |           |           |                         |
|-----------------------------------------------------|-----------------|-----------|------------|---------------|-----------|-----------|-------------------------|
| <b>PVA-In<sub>2</sub>O<sub>3</sub></b>              | Nanocrystals    | 38        | 10         | 3             | 25        | 410       | (Singhal et al., 2012)  |
| <b>NiO@ZnO heterostructure</b>                      | Nanotubes       | 215       | 50         | 474           | 50        | 124       | (Xu et al., 2012)       |
| <b>ZnO</b>                                          | Thin film       | 200       | 50         | 0.85          | 13        | 24        | (Shewale et al., 2013)  |
| <b>Pt doped Tungsten oxide</b>                      | Nanoneedles     | 250       | 30         | 33            | 200       | 480       | (Vallejos et al., 2014) |
| <b>In<sub>2</sub>O<sub>3</sub> @ WO<sub>3</sub></b> | Nanoplates      | 150       | 5          | 63            | 5.5 min   | 16 min    | (Yin et al., 2014)      |
| <b>In<sub>2</sub>O<sub>3</sub>/ZnO</b>              | Nanowire        | RT        | 700        | 935           | 100       | 12 h      | (Zang et al., 2014)     |
| <b>Cu doped SnO<sub>2</sub></b>                     | Nanoporous      | 180       | 100        | 25.3%         | 10        | 42        | (Zhang et al., 2014)    |
| <b>Mo-doped ZnO</b>                                 | Nanowire        | 300       | 5          | 14.11         | -         | -         | (Woo et al., 2014)      |
| <b>CuO-functionalized ZnO</b>                       | Nanotetrapods   | 250       | 50         | 17            | -         | 400       | (Kaur et al., 2014)     |
| <b>ZnO</b>                                          | Nanoflower      | RT        | 1          | 296           | 320       | 3592      | (Hosseini et al., 2015) |
| <b>ZnO</b>                                          | <b>Nanorods</b> | <b>RT</b> | <b>100</b> | <b>111.42</b> | <b>23</b> | <b>64</b> | <b>Present Work</b>     |

### Supplementary Table References

- 1 A. Chowdhuri, P. Sharma, V. Gupta, K. Sreenivas and K. V. Rao, *J. Appl. Phys.*, 2002, **92**, 2172–2180.
- 2 L. Liao, H. B. Lu, J. C. Li, C. Liu, D. J. Fu and Y. L. Liu, *Appl. Phys. Lett.*, 2007, **91**, 14–17.
- 3 N. Zhang, K. Yu, Q. Li, Z. Q. Zhu and Q. Wan, *J. Appl. Phys.*, 2008, **103**, 104305 (1–6).
- 4 Z. Liu, T. Fan, D. Zhang, X. Gong and J. Xu, *Sensors Actuators, B Chem.*, 2009, **136**, 499–509.
- 5 S. S. Badadhe and I. S. Mulla, *Sensors Actuators, B Chem.*, 2009, **143**, 164–170.
- 6 L. Mai, L. Xu, Q. Gao, C. Han, B. Hu and Y. Pi, *Nano Lett.*, 2010, **10**, 2604–2608.
- 7 S. J. Kim, C. W. Na, I. S. Hwang and J. H. Lee, *Sensors Actuators, B Chem.*, 2012, **168**, 83–89.
- 8 J. Ma, L. Mei, Y. Chen, Q. Li, T. Wang, Z. Xu, X. Duan and W. Zheng, *Nanoscale*, 2013, **5**, 895–898.
- 9 S. S. Kim, H. G. Na, S.-W. Choi, D. S. Kwak and H. W. Kim, *J. Phys. D. Appl. Phys.*, 2012, **45**, 205301.
- 10 G. Ma, R. Zou, L. Jiang, Z. Zhang, Y. Xue, L. Yu, G. Song, W. Li and J. Hu, *CrystEngComm*, 2012, **14**, 2172–2179.
- 11 A. Singhal, M. Kaur, K. a. Dubey, Y. K. Bhardwaj, D. Jain, C. G. S. Pillai and A. K. Tyagi, *RSC Adv.*, 2012, **2**, 7180–7189.
- 12 L. Xu, R. Zheng, S. Liu, J. Song, J. Chen, B. Dong and H. Song, *Inorg. Chem.*, 2012, **51**, 7733–7740.
- 13 P. S. Shewale, G. L. Agawane, S. W. Shin, a. V. Moholkar, J. Y. Lee, J. H. Kim and M. D. Uplane, *Sensors Actuators B Chem.*, 2013, **177**, 695–702.

- 14 S. Vallejos, T. Stoycheva, F. E. Annanouch, E. Llobet, P. Umek, E. Figueras, C. Canè, I. Gràcia and C. Blackman, *RSC Adv.*, 2014, **4**, 1489–1495.
- 15 L. Yin, D. Chen, M. Hu, H. Shi, D. Yang, B. Fan, G. Shao, R. Zhang and G. Shao, *J. Mater. Chem. A*, 2014, **2**, 18867–18874.
- 16 W. Zang, Y. Nie, D. Zhu, P. Deng, L. Xing and X. Xue, *J. Phys. Chem. C*, 2014, **118**, 9209–9216.
- 17 S. Zhang, P. Zhang, Y. Wang, J. Zhong and X. Sun, *ACS Appl. Mater. Interfaces*, 2014, **6**, 14975–14980.
- 18 H.-S. Woo, C.-H. Kwak, I.-D. Kim and J.-H. Lee, *J. Mater. Chem. A*, 2014, **2**, 6412–6418.
- 19 M. Kaur, K. Ganapathi, V. Mukund, C. Jain, N. S. Ramgir, N. Datta, S. Bhattacharya, a. K. Debnath, D. K. Aswal and S. K. Gupta, *Mater. Chem. Phys.*, 2014, **143**, 1319–1324.
- 20 Z. S. Hosseini, a. I. Zad and a. Mortezaali, *Sensors Actuators B Chem.*, 2015, **207**, 865–871.
